# Supplementary material for: In vivo and ex vivo cetuximab sensitivity assay using three-dimensional primary culture system to stratify KRAS mutant colorectal cancer
Source: PubMed Central journal article supplement (PMC5354432; doi:10.1371/journal.pone.0174151), 2017-03-16
Supplement: pone.0174151.s003.pdf [file pone.0174151.s003.pdf]

## S1 Table

List and effect of the drugs used for screening

| Category             | Inhibitor name               | Relative ATP content |
|----------------------|------------------------------|----------------------|
| BRAF                 | Vemurafenib                  | 1.03                 |
| MEK                  | trametinib                   | 0.17                 |
| mTOR                 | temsirolimus                 | 0.81                 |
| mTOR                 | Torkinib                     | 0.99                 |
| mTOR                 | everolimus                   | 0.74                 |
| EGFR                 | gefitinib                    | 0.97                 |
| EGFR                 | erlotinib                    | 1.07                 |
| EGFR/Her2            | lapatinib                    | 1.11                 |
| c-Met                | PF-04217903                  | 1.04                 |
| EML4-ALK             | crizotinib                   | 0.97                 |
| FGFR                 | PD173074                     | 1.01                 |
| IGF-1R               | OSI-906                      | 1.06                 |
| TGFb-R               | LY2157299                    | 0.90                 |
| TGFb-R               | SD208                        | 0.84                 |
| Hedgehog             | AY 9944                      | 1.10                 |
| Hedgehog             | cyclopamine                  | 1.06                 |
| Hedgehog             | Jervine                      | 1.10                 |
| Hedgehog             | Vismodegib                   | 1.10                 |
| STAT3                | WP1066                       | 1.05                 |
| STAT3                | 5,15-DPP                     | 1.10                 |
| PARP                 | BSI-201 (Iniparib)           | 0.75                 |
| PARP                 | ABT-888 (Veliparib)          | 0.63                 |
| PARP                 | MK-4827 (Niraparib)          | 1.16                 |
| pan-PARP             | PJ-34                        | 1.06                 |
| PARP-1/2-selective   | Olaparib                     | 1.00                 |
| tankyrase-selective  | XAV939                       | 0.97                 |
| PARP                 |                              |                      |
| Wnt                  | IWP-2                        | 1.01                 |
| Wnt                  | IWR-1-endo                   | 0.99                 |
| GSK-3                | BIO                          | 0.75                 |
| GSK-3                | TWS119                       | 1.01                 |
| GSK-3                | CT99021                      | 0.89                 |
| Notch                | DAPT                         | 1.12                 |
| ALK                  | LDN193189                    | 1.00                 |
| Bcr-Abl              | nilotinib                    | 1.04                 |
| Bcr-Abl/Kit          | imatinib mesylate            | 1.08                 |
| Bcr-Abl/Src          | dasatinib                    | 1.07                 |
| Multi-kinases        | sorafenib                    | 0.93                 |
| Multi-kinases        | sunitinib malate             | 1.04                 |
| Multi-kinases        | pazopanib                    | 1.02                 |
| Multi-kinases        | Vandetanib                   | 1.10                 |
| Multi-kinases        | Axitinib                     | 1.14                 |
| Aurora               | ENMD-2076                    | 1.08                 |
| Aurora               | MLN8237                      | 0.69                 |
| Survivin             | YM155                        | 0.29                 |
| Rho/SRF              | CCG-1423                     | 1.02                 |
| ROCK                 | Thiazovivin                  | 0.78                 |
| PDK1                 | OSU-03012                    | 1.12                 |
| JAK                  | Ruxolitinib                  | 1.17                 |
| PIM                  | PIM1/2 Kinase Inhibitor V    | 1.00                 |
| golgi inhibitor      | brefeldin A                  | 0.01                 |
| thalidomide family   | thalidomide                  | 1.05                 |
| thalidomide family   | lenalidomide                 | 1.00                 |
| retinoids            | tretinoin                    | 1.00                 |
| retinoids            | tamibarotene                 | 1.04                 |
| DNA alkylation       | temozolomide                 | 1.02                 |
| AR                   | MDV3100                      | 0.94                 |
| caspase activator    | PAC-1                        | 0.93                 |
| blc-2                | ABT-737                      | 0.92                 |
| G9a                  | UNC0638                      | 0.78                 |
| G9a                  | BIX01294                     | 0.94                 |
| LSD1                 | S2101 (LSD1 inhibitor II)    | 0.95                 |
| PRMT1                | AMI-1                        | 0.85                 |
| SIRT1                | SIRT1 inhibitor III          | 1.03                 |
| SIRT1/2              | Tenovin-6                    | 1.03                 |
| HDAC8                | PCI-34051                    | 0.92                 |
| BRD4 bromodomain     | (+)-JQ1                      | 0.84                 |
| Telomerase           | TMPyP4                       | 0.90                 |
| GLI1                 | Gant61                       | 1.07                 |
| Proteasome           | bortezomib                   | 0.01                 |
| antipsychotic drug   | chlorpromazine hydrochloride | 1.02                 |
| depression treatment | desipramine hydrochloride    | 0.98                 |

ATP content relative to that of non-treated spheroids is shown.  
Effective results (<0.50) are indicated in pink.
